# Supplementary material
Source: ML conference proceedings conference paper supplement (https://proceedings.mlr.press/v97/yu19e.html)
Supplement: Supplementary file [file yu19e-supp.pdf]

## Acknowledgments

This research was supported by Toyota Research Institute, NSF (#1651565, #1522054, #1733686), ONR (N00014-19-1-2145), AFOSR (FA9550-19-1-0024), Amazon AWS, and Qualcomm.

## References

- Abbeel, P. and Ng, A. Y. Apprenticeship learning via inverse reinforcement learning. In *Proceedings of the twenty-first international conference on Machine learning*, pp. 1, 2004.
- Amodei, D. and Clark, J. Faulty reward functions in the wild, 2016.
- Amodei, D., Olah, C., Steinhardt, J., Christiano, P., Schulman, J., and Mané, D. Concrete problems in AI safety. *arXiv preprint arXiv:1606.06565*, 2016.
- Arnold, B. C. and Press, S. J. Compatible conditional distributions. *Journal of the American Statistical Association*, 84(405):152–156, 1989.
- Aumann, R. J. Subjectivity and correlation in randomized strategies. *Journal of mathematical Economics*, 1(1): 67–96, 1974.
- Aumann, R. J. Correlated equilibrium as an expression of bayesian rationality. *Econometrica: Journal of the Econometric Society*, pp. 1–18, 1987.
- Barrett, S., Rosenfeld, A., Kraus, S., and Stone, P. Making friends on the fly: Cooperating with new teammates. *Artificial Intelligence*, 242:132–171, 2017.
- Besag, J. Statistical analysis of non-lattice data. *The statistician*, pp. 179–195, 1975.
- Bogert, K. and Doshi, P. Multi-robot inverse reinforcement learning under occlusion with interactions. In *Proceedings of the 2014 international conference on Autonomous agents and multi-agent systems*, pp. 173–180, 2014.
- Chen, S.-H. and Ip, E. H. Behaviour of the gibbs sampler when conditional distributions are potentially incompatible. *Journal of statistical computation and simulation*, 85(16):3266–3275, 2015.
- Chen, S.-H., Ip, E. H., and Wang, Y. J. Gibbs ensembles for nearly compatible and incompatible conditional models. *Computational statistics & data analysis*, 55(4):1760–1769, 2011.
- Dawid, A. P. and Musio, M. Theory and applications of proper scoring rules. *Metron*, 72(2):169–183, 2014.
- Devlin, S. and Kudenko, D. Theoretical considerations of potential-based reward shaping for multi-agent systems. In *The 10th International Conference on Autonomous Agents and Multiagent Systems - Volume I, AAMAS '11*, pp. 225–232, Richland, SC, 2011. International Foundation for Autonomous Agents and Multiagent Systems. ISBN 9780982657157, 9780982657157.
- Finn, C., Christiano, P., Abbeel, P., and Levine, S. A connection between generative adversarial networks, inverse reinforcement learning, and energy-based models. *arXiv preprint arXiv:1611.03852*, 2016a.
- Finn, C., Levine, S., and Abbeel, P. Guided cost learning: Deep inverse optimal control via policy optimization. In *International Conference on Machine Learning*, pp. 49–58, June 2016b.
- Fu, J., Luo, K., and Levine, S. Learning robust rewards with adversarial inverse reinforcement learning. *arXiv preprint arXiv:1710.11248*, 2017.
- Gandhi, A. The stochastic response dynamic: A new approach to learning and computing equilibrium in continuous games. *Technical Report*, 2012.
- Goodfellow, I., Pouget-Abadie, J., Mirza, M., Xu, B., Warde-Farley, D., Ozair, S., Courville, A., and Bengio, Y. Generative adversarial nets. In *Advances in neural information processing systems*, pp. 2672–2680, 2014.
- Gordon, G. J., Greenwald, A., and Marks, C. No-regret learning in convex games. In *Proceedings of the 25th international conference on Machine learning*, pp. 360–367. ACM, 2008.
- Gu, S., Holly, E., Lillicrap, T., and Levine, S. Deep reinforcement learning for robotic manipulation with asynchronous off-policy updates. In *Robotics and Automation (ICRA), 2017 IEEE International Conference on*, pp. 3389–3396. IEEE, 2017.
- Hadfield-Menell, D., Milli, S., Abbeel, P., Russell, S. J., and Dragan, A. Inverse reward design. In *Advances in Neural Information Processing Systems*, pp. 6765–6774, 2017.
- Hart, S. and Mas-Colell, A. A simple adaptive procedure leading to correlated equilibrium. *Econometrica*, 68(5): 1127–1150, 2000.
- Hastings, W. K. Monte carlo sampling methods using markov chains and their applications. 1970.
- Heckerman, D., Chickering, D. M., Meek, C., Rounthwaite, R., and Kadie, C. Dependency networks for inference, collaborative filtering, and data visualization. *Journal of Machine Learning Research*, 1(Oct):49–75, 2000.

- Ho, J. and Ermon, S. Generative adversarial imitation learning. In *Advances in Neural Information Processing Systems*, pp. 4565–4573, 2016.
- Ho, J., Gupta, J., and Ermon, S. Model-free imitation learning with policy optimization. In *International Conference on Machine Learning*, pp. 2760–2769, 2016.
- Hu, J., Wellman, M. P., and Others. Multiagent reinforcement learning: theoretical framework and an algorithm. In *ICML*, volume 98, pp. 242–250, 1998.
- Kalakrishnan, M., Pastor, P., Righetti, L., and Schaal, S. Learning objective functions for manipulation. In *Robotics and Automation (ICRA), 2013 IEEE International Conference on*, pp. 1331–1336, 2013.
- Le, H. M., Yue, Y., and Carr, P. Coordinated Multi-Agent imitation learning. *arXiv preprint arXiv:1703.03121*, March 2017.
- Lehmann, E. L. and Casella, G. *Theory of point estimation*. Springer Science & Business Media, 2006.
- Leibo, J. Z., Zambaldi, V., Lanctot, M., Marecki, J., and Graepel, T. Multi-agent reinforcement learning in sequential social dilemmas. In *Proceedings of the 16th Conference on Autonomous Agents and MultiAgent Systems*, pp. 464–473, 2017.
- Levine, S. Reinforcement learning and control as probabilistic inference: Tutorial and review. *arXiv preprint arXiv:1805.00909*, 2018.
- Levine, S., Finn, C., Darrell, T., and Abbeel, P. End-to-end training of deep visuomotor policies. *The Journal of Machine Learning Research*, 17(1):1334–1373, 2016.
- Li, Y., Song, J., and Ermon, S. InfoGAIL: Interpretable imitation learning from visual demonstrations. *arXiv preprint arXiv:1703.08840*, 2017.
- Lin, X., Beling, P. A., and Cogill, R. Multi-agent inverse reinforcement learning for zero-sum games. *arXiv preprint arXiv:1403.6508*, 2014.
- Lin, X., Adams, S. C., and Beling, P. A. Multi-agent inverse reinforcement learning for general-sum stochastic games. *arXiv preprint arXiv:1806.09795*, 2018.
- Littman, M. L. Markov games as a framework for multi-agent reinforcement learning. In *Proceedings of the eleventh international conference on machine learning*, volume 157, pp. 157–163, 1994.
- Lowe, R., Wu, Y., Tamar, A., Harb, J., Abbeel, P., and Mordatch, I. Multi-Agent Actor-Critic for mixed Cooperative-Competitive environments. *arXiv preprint arXiv:1706.02275*, June 2017.
- Matignon, L., Jeanpierre, L., Mouaddib, A.-I., and Others. Coordinated Multi-Robot exploration under communication constraints using decentralized markov decision processes. In *AAAI*, 2012.
- McKelvey, R. D. and Palfrey, T. R. Quantal response equilibria for normal form games. *Games and economic behavior*, 10(1):6–38, 1995.
- McKelvey, R. D. and Palfrey, T. R. Quantal response equilibria for extensive form games. *Experimental economics*, 1(1):9–41, 1998.
- Mnih, V., Kavukcuoglu, K., Silver, D., Rusu, A. A., Veness, J., Bellemare, M. G., Graves, A., Riedmiller, M., Fidjeland, A. K., Ostrovski, G., et al. Human-level control through deep reinforcement learning. *Nature*, 518(7540): 529, 2015.
- Natarajan, S., Kunapuli, G., Judah, K., Tadepalli, P., Kersting, K., and Shavlik, J. Multi-agent inverse reinforcement learning. In *Machine Learning and Applications (ICMLA), 2010 Ninth International Conference on*, pp. 395–400, 2010.
- Ng, A. Y., Harada, D., and Russell, S. Policy invariance under reward transformations: Theory and application to reward shaping. In *ICML*, volume 99, pp. 278–287, 1999.
- Ng, A. Y., Russell, S. J., et al. Algorithms for inverse reinforcement learning. In *Icml*, pp. 663–670, 2000.
- Nisan, N., Schapira, M., Valiant, G., and Zohar, A. Best-response mechanisms. In *ICS*, pp. 155–165, 2011.
- Peng, P., Yuan, Q., Wen, Y., Yang, Y., Tang, Z., Long, H., and Wang, J. Multiagent Bidirectionally-Coordinated nets for learning to play StarCraft combat games. *arXiv preprint arXiv:1703.10069*, 2017.
- Pomerleau, D. A. Efficient training of artificial neural networks for autonomous navigation. *Neural computation*, 3(1):88–97, 1991. ISSN 0899-7667.
- Reddy, T. S., Gopikrishna, V., Zaruba, G., and Huber, M. Inverse reinforcement learning for decentralized non-cooperative multiagent systems. In *Systems, Man, and Cybernetics (SMC), 2012 IEEE International Conference on*, pp. 1930–1935, 2012.
- Russell, S. Learning agents for uncertain environments. In *Proceedings of the eleventh annual conference on Computational learning theory*, pp. 101–103. ACM, 1998.
- Silver, D., Huang, A., Maddison, C. J., Guez, A., Sifre, L., Van Den Driessche, G., Schrittwieser, J., Antonoglou, I., Panneershelvam, V., Lanctot, M., et al. Mastering the game of go with deep neural networks and tree search. *nature*, 529(7587):484, 2016.

- Song, J., Ren, H., Sadigh, D., and Ermon, S. Multi-agent generative adversarial imitation learning. 2018.
- Šošić, A., KhudaBukhsh, W. R., Zoubir, A. M., and Koeppl, H. Inverse reinforcement learning in swarm systems. In *Proceedings of the 16th Conference on Autonomous Agents and MultiAgent Systems*, pp. 1413–1421. International Foundation for Autonomous Agents and Multiagent Systems, 2017.
- Waugh, K., Ziebart, B. D., and Andrew Bagnell, J. Computational rationalization: The inverse equilibrium problem. *arXiv preprint arXiv:1308.3506*, August 2013.
- Wu, Y., Mansimov, E., Liao, S., Grosse, R., and Ba, J. Scalable trust-region method for deep reinforcement learning using kronecker-factored approximation. *arXiv preprint arXiv:1708.05144*, August 2017.
- Yu, L., Zhang, W., Wang, J., and Yu, Y. Seqgan: Sequence generative adversarial nets with policy gradient. In *AAAI*, pp. 2852–2858, 2017.
- Ziebart, B. D. Modeling purposeful adaptive behavior with the principle of maximum causal entropy. 2010.
- Ziebart, B. D., Maas, A. L., Bagnell, J. A., and Dey, A. K. Maximum entropy inverse reinforcement learning. In *AAAI*, volume 8, pp. 1433–1438, 2008.
- Ziebart, B. D., Bagnell, J. A., and Dey, A. K. Maximum causal entropy correlated equilibria for markov games. In *The 10th International Conference on Autonomous Agents and Multiagent Systems - Volume 1, AAMAS '11*, pp. 207–214, Richland, SC, 2011. International Foundation for Autonomous Agents and Multiagent Systems. ISBN 9780982657157, 9780982657157.
- Zoph, B. and Le, Q. V. Neural architecture search with reinforcement learning. *arXiv preprint arXiv:1611.01578*, 2016.

## A. Appendix

### A.1. Trajectory Distribution Induced by Logistic Stochastic Best Response Equilibrium

Let  $\{\pi_{-i}^t(\mathbf{a}_{-i}^t|s^t)\}_{t=1}^T$  denote other agents' marginal LSBRE policies, and  $\{\hat{\pi}_i^t(a_i^t|\mathbf{a}_{-i}^t, s^t)\}_{t=1}^T$  denote agent  $i$ 's conditional policy. With chain rule, the induced trajectory distribution is given by:

$$\hat{p}(\tau) = \left[ \eta(s^1) \cdot \prod_{t=1}^T P(s^{t+1}|s^t, \mathbf{a}^t) \cdot \pi_{-i}^t(\mathbf{a}_{-i}^t|s^t) \right] \cdot \prod_{t=1}^T \hat{\pi}_i^t(a_i^t|\mathbf{a}_{-i}^t, s^t) \quad (14)$$

Suppose the desired distribution is given by:

$$p(\tau) \propto \left[ \eta(s^1) \cdot \prod_{t=1}^T P(s^{t+1}|s^t, \mathbf{a}^t) \cdot \pi_{-i}^t(\mathbf{a}_{-i}^t|s^t) \right] \cdot \exp\left(\sum_{t=1}^T r_i(s^t, \mathbf{a}_i^t, \mathbf{a}_{-i}^t)\right) \quad (15)$$

Now we will show that the optimal solution to the following optimization problem correspond to the LSBRE conditional policies:

$$\min_{\hat{\pi}_i^{1:T}} D_{\text{KL}}(\hat{p}(\tau)||p(\tau)) \quad (16)$$

The optimization problem in Equation (16) is equivalent to (the partition function of the desired distribution is a constant with respect to optimized policies):

$$\begin{aligned} & \max_{\hat{\pi}_i^{1:T}} \mathbb{E}_{\tau \sim \hat{p}(\tau)} \left[ \log \eta(s^1) + \sum_{t=1}^T (\log P(s^{t+1}|s^t, \mathbf{a}^t) + \log \pi_{-i}^t(\mathbf{a}_{-i}^t|s^t) + r_i(s^t, \mathbf{a}^t)) - \right. \\ & \quad \left. \log \eta(s^1) - \sum_{t=1}^T (\log P(s^{t+1}|s^t, \mathbf{a}^t) + \log \pi_{-i}^t(\mathbf{a}_{-i}^t|s^t) + \log \hat{\pi}_i^t(a_i^t|\mathbf{a}_{-i}^t, s^t)) \right] \\ & = \mathbb{E}_{\tau \sim \hat{p}(\tau)} \left[ \sum_{t=1}^T r_i(s^t, \mathbf{a}^t) - \log \hat{\pi}_i^t(a_i^t|\mathbf{a}_{-i}^t, s^t) \right] = \sum_{t=1}^T \mathbb{E}_{(s^t, \mathbf{a}^t) \sim \hat{p}(s^t, \mathbf{a}^t)} [r_i(s^t, \mathbf{a}^t) - \log \hat{\pi}_i^t(a_i^t|\mathbf{a}_{-i}^t, s^t)] \end{aligned} \quad (17)$$

To maximize this objective, we can use a dynamic programming procedure. Let us first consider the base case of optimizing  $\hat{\pi}_i^T(a_i^T|\mathbf{a}_{-i}^T, s^T)$ :

$$\begin{aligned} & \mathbb{E}_{(s^T, \mathbf{a}^T) \sim \hat{p}(s^T, \mathbf{a}^T)} [r_i(s^T, \mathbf{a}^T) - \log \hat{\pi}_i^T(a_i^T|\mathbf{a}_{-i}^T)] = \\ & \mathbb{E}_{s^T \sim \hat{p}(s^T), \mathbf{a}_{-i}^T \sim \pi_{-i}^T(\cdot|s^T)} \left[ -D_{\text{KL}} \left( \hat{\pi}_i^T(a_i^T|\mathbf{a}_{-i}^T, s^T) \middle\| \frac{\exp(r_i(s^T, a_i^T, \mathbf{a}_{-i}^T))}{\exp(V_i(s^T, \mathbf{a}_{-i}^T))} \right) + V_i(s^T, \mathbf{a}_{-i}^T) \right] \end{aligned} \quad (18)$$

where  $\exp(V_i(s^T, \mathbf{a}_{-i}^T))$  is the partition function and  $V_i(s^T, \mathbf{a}_{-i}^T) = \log \sum_{a_i^T} \exp(r_i(s^T, a_i^T, \mathbf{a}_{-i}^T))$ . The optimal policy is given by:

$$\pi_i^T(a_i^T|\mathbf{a}_{-i}^T, s^T) = \exp(r_i(s^T, a_i^T, \mathbf{a}_{-i}^T) - V_i(s^T, \mathbf{a}_{-i}^T)) \quad (19)$$

With the optimal policy in Equation (19), Equation (18) is equivalent to (with the KL divergence being zero):

$$\mathbb{E}_{(s^T, \mathbf{a}^T) \sim \hat{p}(s^T, \mathbf{a}^T)} [r_i(s^T, \mathbf{a}^T) - \log \hat{\pi}_i^T(a_i^T|\mathbf{a}_{-i}^T)] = \mathbb{E}_{s^T \sim \hat{p}(s^T), \mathbf{a}_{-i}^T \sim \pi_{-i}^T(\cdot|s^T)} [V_i(s^T, \mathbf{a}_{-i}^T)] \quad (20)$$

Then recursively, for a given time step  $t$ ,  $\hat{\pi}_i^t(a_i^t|\mathbf{a}_{-i}^t, s^t)$  must maximize:

$$\mathbb{E}_{(s^t, \mathbf{a}^t) \sim \hat{p}(s^t, \mathbf{a}^t)} \left[ r_i(s^t, \mathbf{a}^t) - \log \hat{\pi}_i^t(a_i^t|\mathbf{a}_{-i}^t, s^t) + \mathbb{E}_{s^{t+1} \sim P(\cdot|s^t, \mathbf{a}^t), \mathbf{a}_{-i}^{t+1} \sim \pi_{-i}^{t+1}(\cdot|s^{t+1})} [V_i^{\pi^{t+2:T}}(s^{t+1}, \mathbf{a}_{-i}^{t+1})] \right] = \quad (21)$$

$$\mathbb{E}_{s^t \sim \hat{p}(s^t), \mathbf{a}_{-i}^t \sim \pi_{-i}^t(\cdot|s^t)} \left[ -D_{\text{KL}} \left( \hat{\pi}_i^t(a_i^t|\mathbf{a}_{-i}^t, s^t) \middle\| \frac{\exp(Q_i^{\pi^{t+1:T}}(s^t, a_i^t, \mathbf{a}_{-i}^t))}{\exp(V_i^{\pi^{t+1:T}}(s^t, \mathbf{a}_{-i}^t))} \right) + V_i^{\pi^{t+1:T}}(s^t, \mathbf{a}_{-i}^t) \right] \quad (22)$$

where we define:

$$Q_i^{\pi^{t+1:T}}(s^t, \mathbf{a}^t) = r_i(s^t, \mathbf{a}^t) + \mathbb{E}_{s^{t+1} \sim p(\cdot | s^t, \mathbf{a}^t)} \left[ \mathcal{H}(\pi_i^{t+1}(\cdot | s^{t+1})) + \mathbb{E}_{\mathbf{a}_{-i}^{t+1} \sim \pi_{-i}^{t+1}(\cdot | s^{t+1})} [V_i(s^{t+1}, \mathbf{a}_{-i}^{t+1})] \right] \quad (23)$$

$$V_i^{\pi^{t+1:T}}(s^t, \mathbf{a}_{-i}^t) = \log \sum_{a'_i} \exp(Q_i^{\pi^{t+1:T}}(s^t, a'_i, \mathbf{a}_{-i}^t)) \quad (24)$$

The optimal policy to Equation (22) is given by:

$$\pi_i^t(a_i^t | \mathbf{a}_{-i}^t, s^t) = \exp(Q_i^{\pi^{t+1:T}}(s^t, \mathbf{a}^t) - V_i^{\pi^{t+1:T}}(s^t, \mathbf{a}_{-i}^t)) \quad (25)$$

which is exactly the set of conditional distributions used to produce LSBRE (Definition 2).

## A.2. Maximum Pseudolikelihood Estimation for LSBRE

Theorem 2 strictly follows the asymptotic consistency property of maximum pseudolikelihood estimation (Lehmann & Casella, 2006; Dawid & Musio, 2014). For simplicity, we will show the proof for normal form games and similar to Appendix A.1, the extension to Markov games can be proved by induction.

Consider a normal form game with  $N$  players and reward functions  $\{r_i(\mathbf{a}; \omega_i)\}_{i=1}^N$ . Suppose the expert demonstrations  $\mathcal{D} = \{(a_1, \dots, a_N)^m\}_{m=1}^M$  are generated by  $\pi(\mathbf{a}; \omega^*)$ , where  $\omega^*$  denotes the true value of the parameters. The pseudolikelihood objective we want to maximize is given by:

$$\ell_{\text{PL}}(\omega) = \frac{1}{M} \sum_{m=1}^M \sum_{i=1}^N \log \pi_i(a_i^m | \mathbf{a}_{-i}^m; \omega_i) = \frac{1}{M} \sum_{m=1}^M \sum_{i=1}^N \log \frac{\exp(r_i(a_i^m, \mathbf{a}_{-i}^m; \omega_i))}{\sum_{a'_i} \exp(r_i(a'_i, \mathbf{a}_{-i}^m; \omega_i))} \quad (26)$$

$$= \frac{1}{M} \sum_{m=1}^M \sum_{i=1}^N r_i(a_i^m, \mathbf{a}_{-i}^m; \omega_i) - \frac{1}{M} \sum_{m=1}^M \sum_{i=1}^N \log Z(\mathbf{a}_{-i}^m; \omega_i) \quad (27)$$

$$= \sum_{i=1}^N \sum_{\mathbf{a}} p_{\mathcal{D}}(\mathbf{a}) r_i(a_i, \mathbf{a}_{-i}; \omega_i) - \sum_{i=1}^N \sum_{\mathbf{a}_{-i}} p_{\mathcal{D}}(\mathbf{a}_{-i}) \log Z(\mathbf{a}_{-i}; \omega_i) \quad (28)$$

where  $p_{\mathcal{D}}$  is the empirical data distribution and  $Z(\mathbf{a}_{-i}; \omega_i)$  is the partition function.

Take derivatives of  $\ell_{\text{PL}}(\omega)$ :

$$\frac{\partial}{\partial \omega} \ell_{\text{PL}}(\omega) = \sum_{i=1}^N \sum_{\mathbf{a}} p_{\mathcal{D}}(\mathbf{a}) \frac{\partial}{\partial \omega} r_i(a_i, \mathbf{a}_{-i}; \omega_i) - \sum_{i=1}^N \sum_{\mathbf{a}_{-i}} p_{\mathcal{D}}(\mathbf{a}_{-i}) \frac{1}{Z(\mathbf{a}_{-i}; \omega_i)} \frac{\partial}{\partial \omega} Z(\mathbf{a}_{-i}; \omega_i) \quad (29)$$

$$= \sum_{i=1}^N \sum_{\mathbf{a}} p_{\mathcal{D}}(\mathbf{a}) \frac{\partial}{\partial \omega} r_i(a_i, \mathbf{a}_{-i}; \omega_i) - \sum_{i=1}^N \sum_{\mathbf{a}_{-i}} p_{\mathcal{D}}(\mathbf{a}_{-i}) \sum_{a_i} \frac{\exp(r_i(a_i, \mathbf{a}_{-i}; \omega_i))}{Z(\mathbf{a}_{-i}; \omega_i)} \frac{\partial}{\partial \omega} r_i(a_i, \mathbf{a}_{-i}; \omega_i) \quad (30)$$

$$= \sum_{i=1}^N \sum_{\mathbf{a}} p_{\mathcal{D}}(\mathbf{a}) \frac{\partial}{\partial \omega} r_i(a_i, \mathbf{a}_{-i}; \omega_i) - \sum_{i=1}^N \sum_{\mathbf{a}_{-i}} p_{\mathcal{D}}(\mathbf{a}_{-i}) \sum_{a_i} \pi_i(a_i | \mathbf{a}_{-i}; \omega_i) \frac{\partial}{\partial \omega} r_i(a_i, \mathbf{a}_{-i}; \omega_i) \quad (31)$$

When the sample size  $m \rightarrow \infty$ , Equation (31) is equivalent to:

$$\frac{\partial}{\partial \omega} \ell_{\text{PL}}(\omega) = \sum_{i=1}^N \sum_{\mathbf{a}} p(\mathbf{a}; \omega^*) \frac{\partial}{\partial \omega} r_i(a_i, \mathbf{a}_{-i}; \omega_i) - \sum_{i=1}^N \sum_{\mathbf{a}_{-i}} p(\mathbf{a}_{-i}; \omega^*) \sum_{a_i} \pi_i(a_i | \mathbf{a}_{-i}; \omega_i) \frac{\partial}{\partial \omega} r_i(a_i, \mathbf{a}_{-i}; \omega_i) \quad (32)$$

$$= \sum_{i=1}^N \sum_{\mathbf{a}_{-i}} p(\mathbf{a}_{-i}; \omega^*) \sum_{a_i} (p(a_i | \mathbf{a}_{-i}; \omega^*) - \pi_i(a_i | \mathbf{a}_{-i}; \omega_i)) \frac{\partial}{\partial \omega} r_i(a_i, \mathbf{a}_{-i}; \omega_i) \quad (33)$$

When  $\omega = \omega^*$ , the gradients in Equation (33) will be zero.
